# Supplementary material
Source: PubMed Central journal article supplement (PMC7968385)

# **Supplementary information:**

## **Serotonin receptor 1A variation is associated with anxiety and agonistic behavior in chimpanzees**

Nicky Staes<sup>1,2,3,\*</sup>, Chet C. Sherwood<sup>1</sup>, Hani Freeman<sup>4</sup>, Sarah F. Brosnan<sup>4,5,6</sup>, Steven J. Schapiro<sup>4</sup>, William D. Hopkins<sup>6,7</sup> and Brenda J. Bradley<sup>1</sup>

<sup>1</sup> Center for the Advanced Study of Human Paleobiology, Department of Anthropology, The George Washington University

<sup>2</sup> Behavioral Ecology and Ecophysiology Group, Department of Biology, University of Antwerp

<sup>3</sup> Centre for Research and Conservation, Royal Zoological Society of Antwerp

<sup>4</sup> Michale E. Keeling Center for Comparative Medicine and Research, The University of Texas MD Anderson Cancer Center

<sup>5</sup> Department of Psychology, Georgia State University, Atlanta, GA 30302

<sup>6</sup> Neuroscience Institute and Language Research Center, Georgia State University, Atlanta, GA 30302

<sup>7</sup> Ape Cognition and Conservation Initiative, Des Moines, IA, USA

\* Corresponding author: [nickystaes2@gmail.com](mailto:nickystaes2@gmail.com)

**Table S1: Values for positive diversifying selection per amino acid codon**

| AA | $\omega$      | p    | AA  | $\omega$ | p    | AA  | $\omega$ | p    | AA  | $\omega$    | p    | AA  | $\omega$    | p    | AA  | $\omega$     | p    | AA  | $\omega$    | p    |
|----|---------------|------|-----|----------|------|-----|----------|------|-----|-------------|------|-----|-------------|------|-----|--------------|------|-----|-------------|------|
| 1  | 0.00          | 1.00 | 62  | 0.00     | 1.00 | 123 | 0.00     | 1.00 | 184 | 0.00        | 1.00 | 245 | 0.13        | 0.67 | 306 | 0.00         | 0.67 | 367 | 0.00        | 0.67 |
| 2  | 0.19          | 0.39 | 63  | 0.00     | 0.67 | 124 | 0.00     | 1.00 | 185 | 0.20        | 0.51 | 246 | 0.06        | 0.67 | 307 | 0.00         | 0.67 | 368 | 0.00        | 0.67 |
| 3  | 0.48          | 0.35 | 64  | 0.00     | 1.00 | 125 | 0.00     | 0.67 | 186 | 0.08        | 0.67 | 247 | 0.00        | 0.67 | 308 | 0.00         | 1.00 | 369 | 0.00        | 0.67 |
| 4  | 0.26          | 0.43 | 65  | 0.00     | 1.00 | 126 | 0.00     | 0.67 | 187 | 0.00        | 1.00 | 248 | <b>8.81</b> | 0.14 | 309 | 0.20         | 0.51 | 370 | 0.00        | 1.00 |
| 5  | 0.00          | 0.67 | 66  | 0.00     | 1.00 | 127 | 0.00     | 0.67 | 188 | 0.00        | 0.67 | 249 | 0.08        | 0.67 | 310 | 0.00         | 0.67 | 371 | 0.00        | 0.67 |
| 6  | 0.20          | 0.67 | 67  | 0.00     | 0.67 | 128 | 0.00     | 1.00 | 189 | 0.00        | 0.67 | 250 | 0.00        | 1.00 | 311 | 0.13         | 0.67 | 372 | 0.00        | 0.67 |
| 7  | 0.00          | 0.67 | 68  | 0.00     | 1.00 | 129 | 0.00     | 1.00 | 190 | 0.00        | 1.00 | 251 | 0.05        | 0.67 | 312 | 0.00         | 0.67 | 373 | 0.00        | 0.67 |
| 8  | 0.00          | 0.67 | 69  | 0.00     | 0.67 | 130 | 0.00     | 0.67 | 191 | 0.00        | 1.00 | 252 | 0.00        | 1.00 | 313 | <u>15.82</u> | 0.03 | 374 | 0.00        | 0.67 |
| 9  | 0.00          | 0.67 | 70  | 0.00     | 0.67 | 131 | 0.00     | 0.67 | 192 | 0.00        | 0.67 | 253 | 0.02        | 0.67 | 314 | 0.47         | 0.34 | 375 | 0.00        | 1.00 |
| 10 | 0.00          | 1.00 | 71  | 0.00     | 1.00 | 132 | 0.00     | 0.67 | 193 | 0.00        | 0.67 | 254 | 0.37        | 0.67 | 315 | 0.14         | 0.67 | 376 | 0.00        | 1.00 |
| 11 | 0.00          | 0.67 | 72  | 0.00     | 0.67 | 133 | 0.00     | 1.00 | 194 | 0.00        | 0.67 | 255 | 0.00        | 0.67 | 316 | 0.68         | 0.67 | 377 | 0.00        | 1.00 |
| 12 | 0.00          | 0.67 | 73  | 0.00     | 1.00 | 134 | 0.00     | 1.00 | 195 | 0.00        | 1.00 | 256 | 0.00        | 0.67 | 317 | 0.06         | 0.67 | 378 | 0.00        | 0.67 |
| 13 | 0.00          | 0.67 | 74  | 0.00     | 0.67 | 135 | 0.00     | 1.00 | 196 | 0.00        | 0.67 | 257 | 0.05        | 0.67 | 318 | <b>5.43</b>  | 0.31 | 379 | 0.00        | 0.67 |
| 14 | 0.18          | 0.67 | 75  | 0.00     | 0.67 | 136 | 0.00     | 1.00 | 197 | 0.00        | 0.67 | 258 | 0.00        | 0.67 | 319 | 0.00         | 0.67 | 380 | 0.00        | 0.67 |
| 15 | 0.00          | 0.67 | 76  | 0.00     | 0.67 | 137 | 0.00     | 0.67 | 198 | 0.00        | 0.67 | 259 | 0.00        | 0.67 | 320 | 0.33         | 0.67 | 381 | 0.00        | 0.67 |
| 16 | 0.16          | 0.67 | 77  | 0.00     | 0.67 | 138 | 0.00     | 1.00 | 199 | 0.00        | 1.00 | 260 | 0.17        | 0.67 | 321 | 0.06         | 0.67 | 382 | 0.00        | 0.67 |
| 17 | <u>324.18</u> | 0.05 | 78  | 0.00     | 0.67 | 139 | 0.00     | 0.67 | 200 | 0.00        | 0.67 | 261 | 0.06        | 0.67 | 322 | 0.00         | 1.00 | 383 | 0.00        | 0.67 |
| 18 | 0.24          | 0.43 | 79  | 0.00     | 0.67 | 140 | 0.00     | 1.00 | 201 | 0.00        | 0.67 | 262 | 0.12        | 0.67 | 323 | 0.06         | 0.67 | 384 | 0.00        | 0.67 |
| 19 | 0.00          | 0.67 | 80  | 0.00     | 1.00 | 141 | 0.00     | 0.67 | 202 | 0.00        | 0.67 | 263 | 0.00        | 0.67 | 324 | 0.00         | 0.67 | 385 | 0.00        | 0.67 |
| 20 | <b>5.42</b>   | 0.33 | 81  | 0.00     | 0.67 | 142 | 0.00     | 0.67 | 203 | 0.00        | 0.67 | 264 | 0.00        | 0.67 | 325 | 0.00         | 0.67 | 386 | 0.00        | 0.67 |
| 21 | 0.00          | 0.67 | 82  | 0.00     | 0.67 | 143 | 0.00     | 1.00 | 204 | 0.00        | 1.00 | 265 | 0.31        | 0.67 | 326 | 0.00         | 1.00 | 387 | 0.00        | 1.00 |
| 22 | 0.00          | 0.67 | 83  | 0.00     | 1.00 | 144 | 0.00     | 1.00 | 205 | 0.00        | 0.67 | 266 | 0.25        | 0.67 | 327 | 0.00         | 1.00 | 388 | 0.00        | 0.67 |
| 23 | <b>4.62</b>   | 0.17 | 84  | 0.00     | 1.00 | 145 | 0.00     | 1.00 | 206 | 0.00        | 0.67 | 267 | 0.02        | 0.67 | 328 | 0.24         | 0.67 | 389 | 0.00        | 0.67 |
| 24 | 0.00          | 0.67 | 85  | 0.00     | 1.00 | 146 | 0.00     | 1.00 | 207 | 0.00        | 0.67 | 268 | 0.43        | 0.46 | 329 | 0.00         | 0.67 | 390 | 0.00        | 0.67 |
| 25 | 0.96          | 0.67 | 86  | 0.00     | 0.67 | 147 | 0.00     | 1.00 | 208 | 0.00        | 0.67 | 269 | 0.84        | 0.32 | 330 | <b>4.20</b>  | 0.37 | 391 | 0.00        | 1.00 |
| 26 | <u>275.10</u> | 0.03 | 87  | 0.00     | 1.00 | 148 | 0.00     | 1.00 | 209 | 0.00        | 0.67 | 270 | 0.13        | 0.67 | 331 | 0.00         | 0.67 | 392 | 0.00        | 1.00 |
| 27 | 0.00          | 0.67 | 88  | 0.00     | 0.67 | 149 | 0.00     | 0.67 | 210 | 0.00        | 1.00 | 271 | 0.00        | 0.67 | 332 | 0.00         | 0.67 | 393 | 0.00        | 0.67 |
| 28 | 0.21          | 0.48 | 89  | 0.00     | 0.67 | 150 | 0.00     | 1.00 | 211 | 0.00        | 1.00 | 272 | <b>1.05</b> | 0.20 | 333 | 0.00         | 1.00 | 394 | 0.00        | 0.67 |
| 29 | 0.00          | 0.67 | 90  | 0.00     | 1.00 | 151 | 0.00     | 1.00 | 212 | 0.00        | 1.00 | 273 | 0.00        | 0.67 | 334 | 0.00         | 1.00 | 395 | 0.00        | 0.67 |
| 30 | 0.20          | 0.51 | 91  | 0.00     | 1.00 | 152 | 0.00     | 1.00 | 213 | 0.00        | 0.67 | 274 | <u>1.40</u> | 0.02 | 335 | 0.00         | 1.00 | 396 | 0.00        | 0.67 |
| 31 | 0.00          | 1.00 | 92  | 0.00     | 1.00 | 153 | 0.00     | 0.67 | 214 | 0.00        | 1.00 | 275 | 0.98        | 0.16 | 336 | 0.00         | 0.67 | 397 | 0.00        | 0.67 |
| 32 | 0.00          | 1.00 | 93  | 0.00     | 0.67 | 154 | 0.00     | 1.00 | 215 | 0.00        | 0.67 | 276 | 0.00        | 0.67 | 337 | 0.00         | 0.67 | 398 | 0.00        | 0.67 |
| 33 | <u>153.05</u> | 0.07 | 94  | 0.00     | 0.67 | 155 | 0.00     | 1.00 | 216 | 0.00        | 1.00 | 277 | 0.08        | 0.67 | 338 | 0.00         | 0.67 | 399 | 0.00        | 0.67 |
| 34 | <b>5.76</b>   | 0.31 | 95  | 0.00     | 0.67 | 156 | 0.00     | 0.67 | 217 | 0.00        | 1.00 | 278 | 0.00        | 0.67 | 339 | 0.00         | 0.67 | 400 | 0.00        | 0.67 |
| 35 | 0.00          | 0.67 | 96  | 0.00     | 0.67 | 157 | 0.00     | 1.00 | 218 | 0.00        | 0.67 | 279 | 0.00        | 0.67 | 340 | 0.00         | 1.00 | 401 | 0.00        | 0.67 |
| 36 | 0.00          | 0.67 | 97  | 0.00     | 1.00 | 158 | 0.00     | 0.67 | 219 | 0.00        | 0.67 | 280 | 0.00        | 0.67 | 341 | 0.00         | 0.67 | 402 | 0.00        | 0.67 |
| 37 | 0.00          | 0.67 | 98  | 0.00     | 0.67 | 159 | 0.00     | 1.00 | 220 | 0.00        | 0.67 | 281 | 0.00        | 0.67 | 342 | 0.00         | 0.67 | 403 | 0.00        | 1.00 |
| 38 | 0.00          | 1.00 | 99  | 0.00     | 0.67 | 160 | 0.00     | 1.00 | 221 | 0.00        | 0.67 | 282 | 0.00        | 0.67 | 343 | 0.00         | 0.67 | 404 | 0.00        | 1.00 |
| 39 | 0.00          | 0.67 | 100 | 0.00     | 1.00 | 161 | 0.00     | 1.00 | 222 | 0.00        | 0.67 | 283 | 0.05        | 0.67 | 344 | 0.00         | 1.00 | 405 | 0.00        | 0.67 |
| 40 | 0.00          | 0.67 | 101 | 0.00     | 0.67 | 162 | 0.00     | 0.67 | 223 | 0.00        | 1.00 | 284 | 0.00        | 0.67 | 345 | 0.00         | 1.00 | 406 | 0.00        | 1.00 |
| 41 | 0.00          | 0.67 | 102 | 0.00     | 1.00 | 163 | 0.00     | 0.67 | 224 | 0.00        | 1.00 | 285 | 0.02        | 0.67 | 346 | 0.00         | 0.67 | 407 | 0.00        | 0.67 |
| 42 | 0.00          | 0.67 | 103 | 0.00     | 0.67 | 164 | 0.00     | 1.00 | 225 | 0.00        | 0.67 | 286 | 0.08        | 0.67 | 347 | 0.00         | 1.00 | 408 | 0.00        | 0.67 |
| 43 | 0.00          | 0.67 | 104 | 0.00     | 1.00 | 165 | 0.00     | 0.67 | 226 | 0.00        | 0.67 | 287 | 0.08        | 0.67 | 348 | 0.00         | 1.00 | 409 | 0.00        | 1.00 |
| 44 | 0.00          | 0.67 | 105 | 0.00     | 0.67 | 166 | 0.00     | 1.00 | 227 | 0.00        | 0.67 | 288 | 0.00        | 0.67 | 349 | 0.00         | 0.67 | 410 | 0.00        | 0.67 |
| 45 | 0.00          | 0.67 | 106 | 0.00     | 0.67 | 167 | 0.00     | 0.67 | 228 | 0.00        | 0.67 | 289 | 0.22        | 0.45 | 350 | 0.00         | 0.67 | 411 | 0.00        | 1.00 |
| 46 | 0.00          | 0.67 | 107 | 0.00     | 0.67 | 168 | 0.00     | 0.67 | 229 | 0.00        | 0.67 | 290 | 0.00        | 0.67 | 351 | 0.00         | 1.00 | 412 | 0.00        | 0.67 |
| 47 | 0.00          | 0.67 | 108 | 0.00     | 1.00 | 169 | 0.00     | 0.67 | 230 | 0.00        | 0.67 | 291 | 0.00        | 1.00 | 352 | 0.00         | 0.67 | 413 | 0.00        | 1.00 |
| 48 | 0.00          | 1.00 | 109 | 0.00     | 0.67 | 170 | 0.00     | 1.00 | 231 | 0.00        | 0.67 | 292 | 0.00        | 1.00 | 353 | 0.00         | 0.67 | 414 | 0.00        | 0.67 |
| 49 | 0.00          | 0.67 | 110 | 0.00     | 1.00 | 171 | 0.00     | 0.67 | 232 | 0.00        | 1.00 | 293 | 0.00        | 0.67 | 354 | <b>40.25</b> | 0.14 | 415 | 0.54        | 0.67 |
| 50 | 0.00          | 0.67 | 111 | 0.00     | 0.67 | 172 | 0.00     | 1.00 | 233 | 0.50        | 0.67 | 294 | 0.00        | 0.67 | 355 | 0.00         | 0.67 | 416 | 0.02        | 0.67 |
| 51 | 0.00          | 0.67 | 112 | 0.00     | 0.67 | 173 | 0.00     | 1.00 | 234 | 0.00        | 0.67 | 295 | 0.00        | 0.67 | 356 | 0.00         | 0.67 | 417 | 0.00        | 0.67 |
| 52 | 0.00          | 0.67 | 113 | 0.00     | 0.67 | 174 | 0.00     | 0.67 | 235 | 0.09        | 0.67 | 296 | 0.00        | 0.67 | 357 | 0.00         | 1.00 | 418 | 0.00        | 0.67 |
| 53 | 0.00          | 1.00 | 114 | 0.00     | 1.00 | 175 | 0.00     | 1.00 | 236 | 0.00        | 0.67 | 297 | 0.00        | 0.67 | 358 | 0.00         | 1.00 | 419 | 0.00        | 1.00 |
| 54 | 0.00          | 1.00 | 115 | 0.00     | 0.67 | 176 | 0.00     | 1.00 | 237 | 0.63        | 0.67 | 298 | 0.00        | 1.00 | 359 | 0.00         | 0.67 | 420 | 0.00        | 1.00 |
| 55 | 0.00          | 0.67 | 116 | 0.00     | 0.67 | 177 | 0.00     | 1.00 | 238 | 0.00        | 0.67 | 299 | 0.00        | 1.00 | 360 | 0.00         | 0.67 | 421 | 0.00        | 1.00 |
| 56 | 0.00          | 1.00 | 117 | 0.00     | 1.00 | 178 | 0.00     | 0.67 | 239 | 0.64        | 0.35 | 300 | 0.06        | 0.67 | 361 | 0.00         | 0.67 | 422 | <b>1.08</b> | 0.66 |
| 57 | 0.00          | 1.00 | 118 | 0.00     | 0.67 | 179 | 0.00     | 1.00 | 240 | 0.42        | 0.35 | 301 | 0.00        | 1.00 | 362 | 0.00         | 1.00 |     |             |      |
| 58 | 0.00          | 0.67 | 119 | 0.00     | 0.67 | 180 | 0.00     | 1.00 | 241 | 0.63        | 0.67 | 302 | 0.00        | 1.00 | 363 | 0.00         | 0.67 |     |             |      |
| 59 | 0.00          | 0.67 | 120 | 0.00     | 0.67 | 181 | 0.00     | 1.00 | 242 | 0.99        | 0.67 | 303 | 0.21        | 0.52 | 364 | 0.00         | 1.00 |     |             |      |
| 60 | 0.00          | 1.00 | 121 | 0.00     | 0.67 | 182 | 0.00     | 0.67 | 243 | 0.00        | 0.67 | 304 | 0.00        | 1.00 | 365 | 0.00         | 0.67 |     |             |      |
| 61 | 0.00          | 0.67 | 122 | 0.00     | 0.67 | 183 | 0.20     | 0.51 | 244 | <b>1.50</b> | 0.57 | 305 | 0.00        | 0.67 | 366 | 0.00         | 0.67 |     |             |      |

Boldface indicates  $\omega > 1$ , underlined shows p-value  $> 0.10$ , AA indicates amino acid sequence codon number

**Table S2:** Information for models with significant genotype effects

| Display     | Parameter       | <i>F</i> | Df    | <i>p</i> |                           | Estimate | Std. Error |
|-------------|-----------------|----------|-------|----------|---------------------------|----------|------------|
|             | relatedness     | 0.21     | 1,43  | 0.650    | relatedness               | -2.15    | 3.24       |
|             | genotype : sex  | 4.75     | 2,43  | 0.014    | genotype AC : sex female  | 0.07     | 0.15       |
|             |                 |          |       |          | genotype CC : sex female  | -0.5     | 0.19       |
| Proximity   | Parameter       | <i>F</i> | Df    | <i>p</i> |                           | Estimate | Std. Error |
|             | relatedness     | 6.16     | 1,41  | 0.017    | relatedness               | 36.81    | 16.38      |
|             | genotype : rank | 3.28     | 4,41  | 0.020    | genotype AC : rank medium | 1.65     | 0.92       |
|             |                 |          |       |          | genotype AC : rank high   | 3.16     | 0.91       |
|             |                 |          |       |          | genotype CC : rank medium | 0.2      | 1.05       |
|             |                 |          |       |          | genotype CC : rank high   | 0.02     | 1.44       |
| Groom other | Parameter       | <i>F</i> | Df    | <i>p</i> |                           | Estimate | Std. Error |
|             | genotype        | 4.93     | 2,44  | 0.011    | genotype AC               | 0.03     | 0.17       |
|             |                 |          |       |          | genotype CC               | -0.57    | 0.21       |
|             | relatedness     | 0.72     | 1,44  | 0.399    | relatedness               | 6.27     | 0.40       |
| Anxious     | Parameter       | <i>F</i> | Df    | <i>p</i> |                           | Estimate | Std. Error |
|             | genotype        | 4.3      | 2,209 | 0.015    | genotype AC               | -0.242   | 0.137      |
|             |                 |          |       |          | genotype CC               | 0.35     | 0.211      |
|             | relatedness     | 5.5      | 1,209 | 0.02     | relatedness               | -9.211   | 3.943      |

F = F-test, Df = degrees of freedom, p=p-value, Std. error = standard error. Parameters shown in this table represent parameters belonging to the model with the lowest AIC value. If interaction effects were significant, the parameters for main effects were not interpreted.

**Table S3:** Mean genotype scores and standard error of behavioral variables and coded dimensions.

| Behavior                  | AA    |       | AC    |       | CC    |       |
|---------------------------|-------|-------|-------|-------|-------|-------|
|                           | Mean  | SE    | Mean  | SE    | Mean  | SE    |
| Sexual                    | 0.265 | 0.040 | 0.227 | 0.045 | 0.300 | 0.033 |
| Contact aggression        | 0.116 | 0.022 | 0.103 | 0.018 | 0.140 | 0.020 |
| Noncontact aggression     | 0.212 | 0.029 | 0.196 | 0.026 | 0.281 | 0.018 |
| Display                   | 0.544 | 0.043 | 0.533 | 0.046 | 0.612 | 0.074 |
| Post-conflict affiliation | 0.037 | 0.010 | 0.067 | 0.013 | 0.013 | 0.005 |
| Affiliation               | 0.262 | 0.016 | 0.375 | 0.021 | 0.381 | 0.021 |
| Contact sitting           | 0.527 | 0.022 | 0.573 | 0.038 | 0.464 | 0.028 |
| Groom other               | 1.270 | 0.075 | 1.316 | 0.071 | 0.714 | 0.063 |
| Proximity                 | 2.808 | 0.153 | 3.060 | 0.228 | 1.944 | 0.163 |
| Play                      | 0.416 | 0.040 | 0.337 | 0.060 | 0.243 | 0.028 |
| Begging                   | 0.216 | 0.024 | 0.242 | 0.028 | 0.230 | 0.028 |
| Displace                  | 0.135 | 0.016 | 0.154 | 0.018 | 0.076 | 0.016 |
| Groom Self                | 1.236 | 0.116 | 0.914 | 0.068 | 1.060 | 0.074 |
| Submissive                | 0.194 | 0.023 | 0.205 | 0.019 | 0.203 | 0.018 |
| Dominance                 | 0.540 | 0.042 | 0.551 | 0.041 | 0.597 | 0.021 |
| Affiliation               | 0.422 | 0.015 | 0.612 | 0.034 | 0.470 | 0.026 |
| Proximity                 | 4.330 | 0.583 | 4.396 | 0.536 | 2.163 | 0.903 |
| Solitary                  | 1.499 | 0.135 | 1.243 | 0.099 | 1.645 | 0.101 |

In case variables were transformed to adhere to the normality assumption, the means indicated in this table are the means of the variable after transformation.

**Table S4:** Estimated mean genotype scores on rated personality adjectives and dimensions after correction for relatedness

| Item                | AA   |      | AC   |      | CC   |      |
|---------------------|------|------|------|------|------|------|
|                     | Mean | SE   | Mean | SE   | Mean | SE   |
| Active              | 4.16 | 0.12 | 4.21 | 0.12 | 4.47 | 0.23 |
| Affectionate        | 4.71 | 0.10 | 4.76 | 0.10 | 4.92 | 0.19 |
| Affiliative         | 4.72 | 0.09 | 4.63 | 0.09 | 4.89 | 0.17 |
| Aggressive          | 3.77 | 0.12 | 3.73 | 0.12 | 3.80 | 0.23 |
| Anxious             | 3.69 | 0.10 | 3.47 | 0.10 | 4.04 | 0.19 |
| Autistic            | 2.87 | 0.09 | 2.92 | 0.10 | 3.00 | 0.19 |
| Bold                | 4.32 | 0.11 | 4.33 | 0.11 | 4.17 | 0.21 |
| Bullying            | 3.88 | 0.11 | 3.69 | 0.12 | 3.76 | 0.22 |
| Calm                | 3.99 | 0.10 | 4.12 | 0.10 | 4.16 | 0.19 |
| Cautious            | 4.11 | 0.09 | 4.16 | 0.09 | 4.31 | 0.18 |
| Considerate/Kind    | 4.19 | 0.09 | 4.27 | 0.09 | 4.32 | 0.18 |
| Deceptive           | 3.65 | 0.10 | 3.49 | 0.10 | 3.53 | 0.19 |
| Defiant             | 3.86 | 0.11 | 3.75 | 0.11 | 3.93 | 0.21 |
| Dependent           | 4.06 | 0.10 | 4.06 | 0.10 | 4.23 | 0.19 |
| Depressed           | 3.14 | 0.09 | 3.14 | 0.09 | 3.13 | 0.17 |
| Dominant            | 4.24 | 0.13 | 4.13 | 0.13 | 4.21 | 0.25 |
| Eccentric           | 3.58 | 0.10 | 3.68 | 0.11 | 3.69 | 0.21 |
| Excitable           | 4.35 | 0.11 | 4.16 | 0.11 | 4.38 | 0.21 |
| Fearful             | 3.69 | 0.10 | 3.65 | 0.10 | 4.05 | 0.20 |
| Human oriented      | 4.53 | 0.13 | 4.49 | 0.13 | 4.41 | 0.25 |
| Impulsive           | 3.82 | 0.09 | 3.65 | 0.10 | 3.80 | 0.19 |
| Inquisitive         | 4.44 | 0.09 | 4.45 | 0.09 | 4.68 | 0.18 |
| Intelligent         | 4.82 | 0.09 | 4.71 | 0.09 | 4.83 | 0.18 |
| Inventive           | 3.95 | 0.10 | 4.04 | 0.10 | 4.17 | 0.20 |
| Irritable           | 3.72 | 0.10 | 3.66 | 0.10 | 3.71 | 0.20 |
| Jealous             | 4.45 | 0.10 | 4.21 | 0.10 | 4.69 | 0.20 |
| Manipulative        | 4.10 | 0.10 | 4.09 | 0.10 | 3.88 | 0.19 |
| Methodical          | 4.21 | 0.08 | 4.14 | 0.08 | 4.28 | 0.16 |
| Mischievous         | 3.72 | 0.11 | 3.79 | 0.11 | 3.92 | 0.21 |
| Persistent          | 4.52 | 0.07 | 4.58 | 0.08 | 4.72 | 0.14 |
| Playful             | 4.04 | 0.12 | 4.11 | 0.12 | 4.23 | 0.23 |
| Predictable         | 4.68 | 0.08 | 4.81 | 0.08 | 4.74 | 0.15 |
| Protective          | 4.20 | 0.10 | 4.26 | 0.10 | 4.29 | 0.19 |
| Relaxed             | 4.19 | 0.09 | 4.39 | 0.09 | 4.15 | 0.18 |
| Self-caring         | 4.64 | 0.08 | 4.74 | 0.08 | 4.92 | 0.15 |
| Sexual              | 4.13 | 0.11 | 3.99 | 0.11 | 4.47 | 0.22 |
| Socially inept      | 3.07 | 0.09 | 3.15 | 0.09 | 3.17 | 0.18 |
| Solitary            | 3.64 | 0.10 | 3.52 | 0.10 | 3.44 | 0.19 |
| Stingy              | 4.39 | 0.10 | 4.20 | 0.11 | 4.29 | 0.20 |
| Temperamental moody | 3.85 | 0.10 | 3.71 | 0.11 | 3.80 | 0.20 |
| Timid               | 3.48 | 0.10 | 3.38 | 0.11 | 3.67 | 0.20 |
| Reactivity          | 3.87 | 0.07 | 3.78 | 0.07 | 3.87 | 0.13 |
| Dominance           | 4.22 | 0.07 | 4.27 | 0.07 | 4.03 | 0.14 |
| Openness            | 4.50 | 0.07 | 4.51 | 0.07 | 4.62 | 0.14 |
| Extraversion        | 4.38 | 0.07 | 4.38 | 0.08 | 4.58 | 0.14 |
| Agreeableness       | 4.20 | 0.08 | 4.27 | 0.09 | 4.30 | 0.17 |
| Methodical          | 4.43 | 0.06 | 4.44 | 0.06 | 4.60 | 0.12 |

**Table S5:** Species included in mixed effects model of evolution to test for diversifying selection

| Scientific name                     | Common name                        | Genome  | Order     |
|-------------------------------------|------------------------------------|---------|-----------|
| <i>Callithrix jacchus</i>           | Common marmoset                    | calJac3 | Primates  |
| <i>Cebus capucinus imitator</i>     | Panamanian white-throated capuchin | cebCap1 | Primates  |
| <i>Cercocebus atys</i>              | Sooty mangabey                     | cerAty1 | Primates  |
| <i>Chlorocebus sabaues</i>          | Green monkey                       | chlSab2 | Primates  |
| <i>Colobus angolensis palliatus</i> | Angolan colobus                    | colAng1 | Primates  |
| <i>Eulemur flavifrons</i>           | Blue-eyed black lemur              | eulFla1 | Primates  |
| <i>Eulemur macaco</i>               | Black lemur                        | eulMac1 | Primates  |
| <i>Gorilla gorilla gorilla</i>      | Western lowland gorilla            | gorGor5 | Primates  |
| <i>Homo sapiens</i>                 | Human                              | hg38    | Primates  |
| <i>Macaca fascicularis</i>          | Crab eating macaque                | macFas5 | Primates  |
| <i>Macaca mulatta</i>               | Rhesus macaque                     | rheMac8 | Primates  |
| <i>Macaca nemestrina</i>            | Pig tailed macaque                 | macNem1 | Primates  |
| <i>Mandrillus leucophaeus</i>       | Drill                              | manLeu1 | Primates  |
| <i>Microcebus murinus</i>           | Gray mouse lemur                   | micMur3 | Primates  |
| <i>Nomascus leucogenys</i>          | Northern white-cheeked gibbon      | nomLeu3 | Primates  |
| <i>Otolemur garnettii</i>           | Northern greater galago            | otoGar3 | Primates  |
| <i>Pan paniscus</i>                 | Bonobo                             | panPan2 | Primates  |
| <i>Pan troglodytes</i>              | Chimpanzee                         | panTro5 | Primates  |
| <i>Papio anubis</i>                 | Olive baboon                       | papAnu3 | Primates  |
| <i>Pongo abelii</i>                 | Sumatran orang-utan                | ponAbe2 | Primates  |
| <i>Propithecus coquereli</i>        | Coquerel's sifaka                  | proCoq1 | Primates  |
| <i>Rhinopithecus bieti</i>          | Black snub nosed monkey            | rhiBie1 | Primates  |
| <i>Rhinopithecus roxellana</i>      | Golden snub nosed monkey           | rhiRox1 | Primates  |
| <i>Saimiri boliviensis</i>          | Black-capped squirrel monkey       | saiBol1 | Primates  |
| <i>Tarsius syrichta</i>             | Philippine tarsier                 | tarSyr2 | Primates  |
| <i>Mus musculus</i>                 | House mouse                        | mm10    | Rodentia  |
| <i>Canis lupus familiaris</i>       | Domestic dog                       | canFam3 | Carnivora |

**Table S6:** Factor loadings of chimpanzee personality traits on six varimax-rotated factors

| Trait          | Reactivity/<br>Undependability | Dominance    | Extraversion | Openness    | Agreeableness | Methodical  |
|----------------|--------------------------------|--------------|--------------|-------------|---------------|-------------|
| Irritable      | <b>0.87</b>                    | -0.09        | -0.05        | -0.09       | -0.13         | 0.15        |
| Temp./moody    | <b>0.85</b>                    | -0.01        | 0.04         | -0.02       | -0.08         | 0.18        |
| Deceptive      | <b>0.79</b>                    | -0.13        | 0.12         | 0.18        | 0.18          | 0.05        |
| Impulsive      | <b>0.77</b>                    | -0.04        | 0.28         | 0.27        | 0.00          | -0.12       |
| Defiant        | <b>0.74</b>                    | -0.06        | 0.31         | 0.22        | -0.03         | -0.10       |
| Mischievous    | <b>0.73</b>                    | 0.07         | 0.41         | 0.33        | -0.01         | -0.13       |
| Jealous        | <b>0.70</b>                    | -0.07        | 0.35         | 0.40        | 0.02          | 0.05        |
| Manipulative   | <b>0.68</b>                    | -0.35        | 0.14         | 0.18        | 0.25          | 0.09        |
| Stingy         | <b>0.68</b>                    | -0.49        | 0.07         | -0.06       | 0.23          | 0.03        |
| Bullying       | <b>0.68</b>                    | -0.56        | 0.25         | -0.07       | 0.06          | 0.03        |
| Aggressive     | <b>0.66</b>                    | -0.42        | 0.41         | -0.12       | -0.06         | 0.14        |
| Eccentric      | <b>0.62</b>                    | 0.13         | -0.22        | 0.36        | -0.04         | -0.14       |
| Socially-inept | <b>0.58</b>                    | 0.36         | 0.02         | 0.07        | -0.37         | -0.06       |
| Calm           | <b>-0.57</b>                   | -0.06        | -0.50        | 0.02        | 0.37          | -0.10       |
| Excitable      | <b>0.56</b>                    | -0.08        | 0.49         | 0.19        | -0.22         | 0.09        |
| Autistic       | <b>0.42</b>                    | 0.36         | -0.22        | 0.05        | -0.03         | -0.28       |
| Fearful        | 0.03                           | <b>-0.88</b> | -0.11        | 0.05        | -0.12         | -0.01       |
| Timid          | -0.14                          | <b>-0.84</b> | -0.27        | -0.23       | -0.09         | -0.04       |
| Cautious       | -0.23                          | <b>-0.81</b> | -0.11        | -0.13       | 0.07          | -0.01       |
| Dominant       | 0.40                           | <b>0.78</b>  | 0.16         | -0.03       | 0.18          | 0.13        |
| Dependent      | -0.02                          | <b>-0.76</b> | 0.21         | 0.01        | 0.30          | -0.15       |
| Anxious        | 0.32                           | <b>-0.75</b> | 0.28         | -0.07       | -0.05         | 0.20        |
| Bold           | 0.53                           | <b>0.61</b>  | 0.35         | 0.29        | 0.12          | 0.05        |
| Relaxed        | -0.44                          | <b>0.48</b>  | -0.46        | 0.05        | 0.31          | -0.15       |
| Solitary       | -0.18                          | 0.16         | <b>-0.77</b> | -0.18       | -0.29         | 0.08        |
| Depressed      | 0.03                           | 0.32         | <b>-0.76</b> | -0.13       | 0.02          | 0.01        |
| Active         | 0.26                           | 0.09         | <b>0.72</b>  | 0.47        | -0.10         | 0.12        |
| Playful        | 0.20                           | 0.06         | <b>0.67</b>  | 0.58        | -0.06         | -0.09       |
| Sexual         | 0.29                           | -0.07        | <b>0.65</b>  | 0.01        | 0.30          | 0.22        |
| Affiliative    | 0.09                           | 0.09         | <b>0.53</b>  | 0.43        | 0.49          | 0.02        |
| Human oriented | 0.08                           | -0.14        | -0.02        | <b>0.83</b> | 0.01          | 0.05        |
| Inq./Curious   | 0.26                           | -0.01        | 0.30         | <b>0.80</b> | -0.03         | 0.00        |
| Inventive      | 0.28                           | 0.03         | 0.20         | <b>0.76</b> | 0.12          | 0.14        |
| Intelligent    | -0.01                          | -0.19        | 0.09         | <b>0.70</b> | -0.08         | 0.50        |
| Aff./Friendly  | -0.28                          | -0.03        | 0.27         | <b>0.61</b> | 0.41          | -0.11       |
| Persistent     | 0.46                           | -0.34        | 0.10         | <b>0.54</b> | 0.11          | 0.15        |
| Protective     | 0.15                           | -0.20        | 0.06         | -0.08       | <b>0.78</b>   | 0.15        |
| Considerate    | -0.44                          | 0.16         | -0.01        | 0.25        | <b>0.63</b>   | 0.14        |
| Self-caring    | 0.05                           | 0.06         | 0.20         | 0.31        | 0.32          | <b>0.55</b> |
| Methodical     | 0.16                           | -0.44        | -0.26        | 0.30        | 0.33          | <b>0.54</b> |

Boldface indicates the items with loadings >0.40 that load onto the factor

**Table S7: Behavioral variables used to determine personality model based on codings**

| <b>Variable</b>                  | <b>Definition</b>                                                                                                                                                                                                                                                                                                                                                                                                                                                                                                                                                                                                                                                                                                                                                                | <b>Method</b> |
|----------------------------------|----------------------------------------------------------------------------------------------------------------------------------------------------------------------------------------------------------------------------------------------------------------------------------------------------------------------------------------------------------------------------------------------------------------------------------------------------------------------------------------------------------------------------------------------------------------------------------------------------------------------------------------------------------------------------------------------------------------------------------------------------------------------------------|---------------|
| <b>Solicit</b>                   | One individual solicits another for assistance, typically during a fight, but may be a solicitation for “consolation” after a fight. This is done with an arm outstretched towards the individual from whom assistance is                                                                                                                                                                                                                                                                                                                                                                                                                                                                                                                                                        | ad libitum    |
| <b>Sexual</b>                    | Any form of initiated sexual behavior between two individuals. This includes solicits, presents, erections (directed at a female), exploration behavior, mounts, and thrusts.                                                                                                                                                                                                                                                                                                                                                                                                                                                                                                                                                                                                    | ad libitum    |
| <b>Contact aggression</b>        | Aggression that does include contact between the animals, such as hitting, jumping on, biting.                                                                                                                                                                                                                                                                                                                                                                                                                                                                                                                                                                                                                                                                                   | ad libitum    |
| <b>Noncontact aggression</b>     | Aggression that does not result in contact between the animals. Examples include screaming at, chasing.                                                                                                                                                                                                                                                                                                                                                                                                                                                                                                                                                                                                                                                                          | ad libitum    |
| <b>Displace</b>                  | One chimpanzee (A) gives way to another (B), who approaches. Chimpanzee B then claims the sitting space, grooming partner, food, toy, etc that chimpanzee A has left behind.                                                                                                                                                                                                                                                                                                                                                                                                                                                                                                                                                                                                     | ad libitum    |
| <b>Affiliation</b>               | Any affiliative interaction which does not fall under the aggressive, submissive, or sexual behavior categories. This may include tandem walking, embrace/kissing, etc. Tandem walk - can be side-by-side or dorsal-ventral. One or both arms of the initiator are placed around the body of the partner from the side or from immediately behind the partner such that bodily contact is made. Does not include carrying of infant by mother. Embrace/Kiss - a ventro-ventral contact when two individuals face each other and each puts both arms around the other or contact with both arms of an individual encompassing another from behind. Alternately, individual brings lips in contact with another individual. Can be mouth-to-mouth or mouth-to-any other body part. | ad libitum    |
| <b>Post-conflict affiliation</b> | Same as above, but following with 60 seconds of (or within the same bout as) an incident of aggression.                                                                                                                                                                                                                                                                                                                                                                                                                                                                                                                                                                                                                                                                          | ad libitum    |
| <b>Contact</b>                   | Individuals are touching in any situation. Can include draping over the other, touching in sitting, standing, or laying down positions, etc.                                                                                                                                                                                                                                                                                                                                                                                                                                                                                                                                                                                                                                     | scan          |
| <b>Play</b>                      | Nonaggressive interactions involving two or more animals. Never accompanied by piloerection, may be accompanied by play-face and/or laughing. Includes rough-and-tumble play (fast paced, vigorous locomotion, wrestling, hitting, pulling, chasing, biting, etc.), quiet play (slower paced, gentle tickling, finger and toe manipulation, etc.), object play, and social play initiation. For solitary play, indicate “no partner”. **Note that at some point, this was indicated using ‘self’.                                                                                                                                                                                                                                                                                | scan          |
| <b>Begging</b>                   | One individual begs for food from another, by sticking out the hand or placing the face close to that of the eating chimpanzee.                                                                                                                                                                                                                                                                                                                                                                                                                                                                                                                                                                                                                                                  | scan          |
| <b>Groom other</b>               | Picking through the hair, searching for and/or removing debris. May be accomplished with hand or mouth. Often accompanied by teeth clacking or lip smacking. Social groom can be directed to another animal or received from another animal. This category also includes scratching (scraping of fingernails across the skin).                                                                                                                                                                                                                                                                                                                                                                                                                                                   | scan          |
| <b>Groom self</b>                | Same as above but directed to itself instead of a social partner.                                                                                                                                                                                                                                                                                                                                                                                                                                                                                                                                                                                                                                                                                                                | scan          |
| <b>Proximity</b>                 | Individuals are within arm’s reach (approximately 1 meter) of their nearest neighbor. Only record for individuals in proximity, all others are presumed to be distant.                                                                                                                                                                                                                                                                                                                                                                                                                                                                                                                                                                                                           | scan          |
| <b>Display</b>                   | Behavioral sequence incorporating such elements as drumming, repeated swaying, exaggerated, often bipedal locomotion, charging and pilo-erection. Also often includes a repetitive slapping of the ground which begins slowly and gradually becomes more vigorous. It may or may not be accompanied by a pant-hoot call. Note the use of objects in display.                                                                                                                                                                                                                                                                                                                                                                                                                     | ad libitum    |
| <b>Fear grimace</b>              | One individual bares teeth while grinning upon an aggression received                                                                                                                                                                                                                                                                                                                                                                                                                                                                                                                                                                                                                                                                                                            | ad libitum    |
| <b>Submissive</b>                | Any submissive behavior directed at the other individual, including pant grunts, bowing, crouching, bobbing, flinching, avoiding, presenting (in a non-sexual context), presenting the wrist, or, bared-teeth display during aggression received                                                                                                                                                                                                                                                                                                                                                                                                                                                                                                                                 | ad libitum    |
| <b>Intervene</b>                 | Interrupting an interaction between two or more individuals; often an interaction is terminated. The intervening animal generally moves quickly where the interaction is taking place, moves between the two animals and may threaten one or both of them.                                                                                                                                                                                                                                                                                                                                                                                                                                                                                                                       | ad libitum    |



**Table S8:** Individuals and subgroup compositions for coding data

| Individual | sex    | Group | rank   | genotype | age | relatedness |
|------------|--------|-------|--------|----------|-----|-------------|
| X1         | Female | 1     | Medium | AA       | 30  | 0.032       |
| X2         | Male   | 1     | High   | AA       | 20  | 0.061       |
| X3         | Male   | 1     | Medium | AA       | 15  | 0.018       |
| X4         | Female | 1     | Medium | AC       | 27  | 0.011       |
| X5         | Male   | 1     | Low    | AA       | 41  | 0.014       |
| X6         | Male   | 1     | Medium | AA       | 41  | 0.017       |
| X7         | Female | 1     | Medium | AC       | 21  | 0.014       |
| X8         | Female | 1     | Medium | CC       | 46  | 0.006       |
| X9         | Female | 1     | Medium | AC       | 46  | 0.008       |
| X10        | Male   | 1     | High   | AA       | 21  | 0.024       |
| X11        | Male   | 1     | High   | AA       | 41  | 0.011       |
| X12        | Female | 1     | High   | AC       | 49  | 0.014       |
| X13        | Male   | 1     | Low    | AA       | 17  | 0.024       |
| X14        | Female | 2     | High   | AC       | 46  | 0.026       |
| X15        | Female | 2     | High   | AC       | 36  | 0.011       |
| X16        | Male   | 2     | Medium | CC       | 19  | 0.020       |
| X17        | Male   | 2     | High   | CC       | 19  | 0.027       |
| X18        | Female | 2     | Low    | CC       | 19  | 0.028       |
| X19        | Female | 2     | Medium | CC       | 24  | 0.027       |
| X20        | Female | 2     | Low    | CC       | 19  | 0.036       |
| X21        | Female | 2     | High   | AC       | 43  | 0.017       |
| X22        | Female | 2     | High   | AC       | 29  | 0.021       |
| X23        | Female | 2     | Medium | AC       | 21  | 0.030       |
| X24        | Female | 3     | Low    | CC       | 22  | 0.014       |
| X25        | Male   | 3     | High   | AC       | 29  | 0.019       |
| X26        | Female | 3     | High   | AA       | 27  | 0.011       |
| X27        | Male   | 3     | Medium | CC       | 28  | 0.034       |
| X28        | Female | 3     | Medium | AC       | 51  | 0.006       |
| X29        | Male   | 3     | Low    | AC       | 12  | 0.020       |
| X30        | Male   | 3     | High   | AC       | 28  | 0.023       |
| X31        | Female | 3     | Medium | AA       | 40  | 0.006       |
| X54        | Female | 3     | Medium | AA       | 36  | 0.008       |
| X32        | Female | 4     | Low    | AA       | 45  | 0.011       |
| X33        | Male   | 4     | High   | AC       | 23  | 0.013       |
| X34        | Female | 4     | Medium | CC       | 45  | 0.006       |
| X35        | Male   | 4     | NA     | AC       | 32  | 0.0083      |
| X36        | Female | 4     | Low    | AC       | 27  | NA          |
| X37        | Female | 4     | Medium | AA       | 48  | 0.006       |
| X38        | Male   | 4     | NA     | AC       | 33  | 0.0083      |
| X39        | Female | 5     | Medium | AC       | 44  | 0.011       |
| X40        | Female | 5     | Low    | AA       | 40  | 0.008       |
| X41        | Male   | 5     | Medium | AC       | 39  | 0.006       |
| X42        | Male   | 5     | High   | AA       | 41  | 0.014       |
| X43        | Female | 5     | Low    | AC       | 28  | 0.014       |
| X44        | Female | 5     | Medium | AC       | 45  | 0.008       |
| X45        | Male   | 5     | High   | AC       | 24  | 0.015       |
| X46        | Female | 5     | Low    | AA       | 19  | 0.014       |
| X47        | Female | 6     | Low    | AA       | 22  | 0.017       |
| X48        | Male   | 6     | High   | AA       | 20  | 0.006       |
| X49        | Female | 6     | Low    | AA       | 43  | 0.008       |
| X50        | Female | 6     | Medium | AA       | 45  | 0.006       |
| X51        | Female | 6     | Medium | AC       | 46  | 0.006       |
| X52        | Male   | 6     | High   | AA       | 50  | 0.006       |
| X53        | Female | 6     | Low    | AC       | 8   | 0.006       |

**Table S9:** Factor loadings of chimpanzee personality traits on four coded varimax-rotated factors

| Behavior                  | Dominance   | Affiliation | Proximity    | Solitary     |
|---------------------------|-------------|-------------|--------------|--------------|
| Solicit                   | <b>0.71</b> | 0.04        | -0.05        | -0.09        |
| Sexual                    | <b>0.70</b> | 0.07        | 0.18         | 0.03         |
| Contact aggression        | <b>0.69</b> | 0.04        | -0.06        | 0.13         |
| Non-contact aggression    | <b>0.61</b> | 0.06        | 0.00         | 0.55         |
| Displace                  | <b>0.48</b> | -0.25       | 0.20         | -0.24        |
| Post-Conflict affiliation | 0.10        | <b>0.76</b> | -0.11        | -0.14        |
| Affiliation               | 0.16        | <b>0.74</b> | 0.18         | 0.06         |
| Contact                   | -0.15       | <b>0.69</b> | -0.15        | -0.13        |
| Play                      | 0.07        | 0.17        | <b>-0.75</b> | -0.11        |
| Begging                   | 0.05        | 0.35        | <b>-0.72</b> | -0.04        |
| Groom other               | 0.20        | 0.27        | <b>0.60</b>  | -0.17        |
| Proximity                 | 0.28        | 0.18        | <b>0.56</b>  | -0.16        |
| Display                   | 0.53        | 0.04        | 0.34         | <b>0.59</b>  |
| Fear grimace              | -0.05       | 0.02        | -0.21        | <b>0.54</b>  |
| Submissive                | 0.38        | 0.31        | 0.06         | <b>-0.48</b> |
| Groom self                | 0.08        | -0.15       | 0.04         | <b>0.48</b>  |
| Intervene                 | -0.11       | 0.34        | 0.32         | 0.38         |

Boldface indicates the items with loadings >0.40 that load onto the factor

**Figure S1:** Genotype effects on individual behaviors potentially reflecting anxiety:  
(A) fear grimace (B) self-grooming

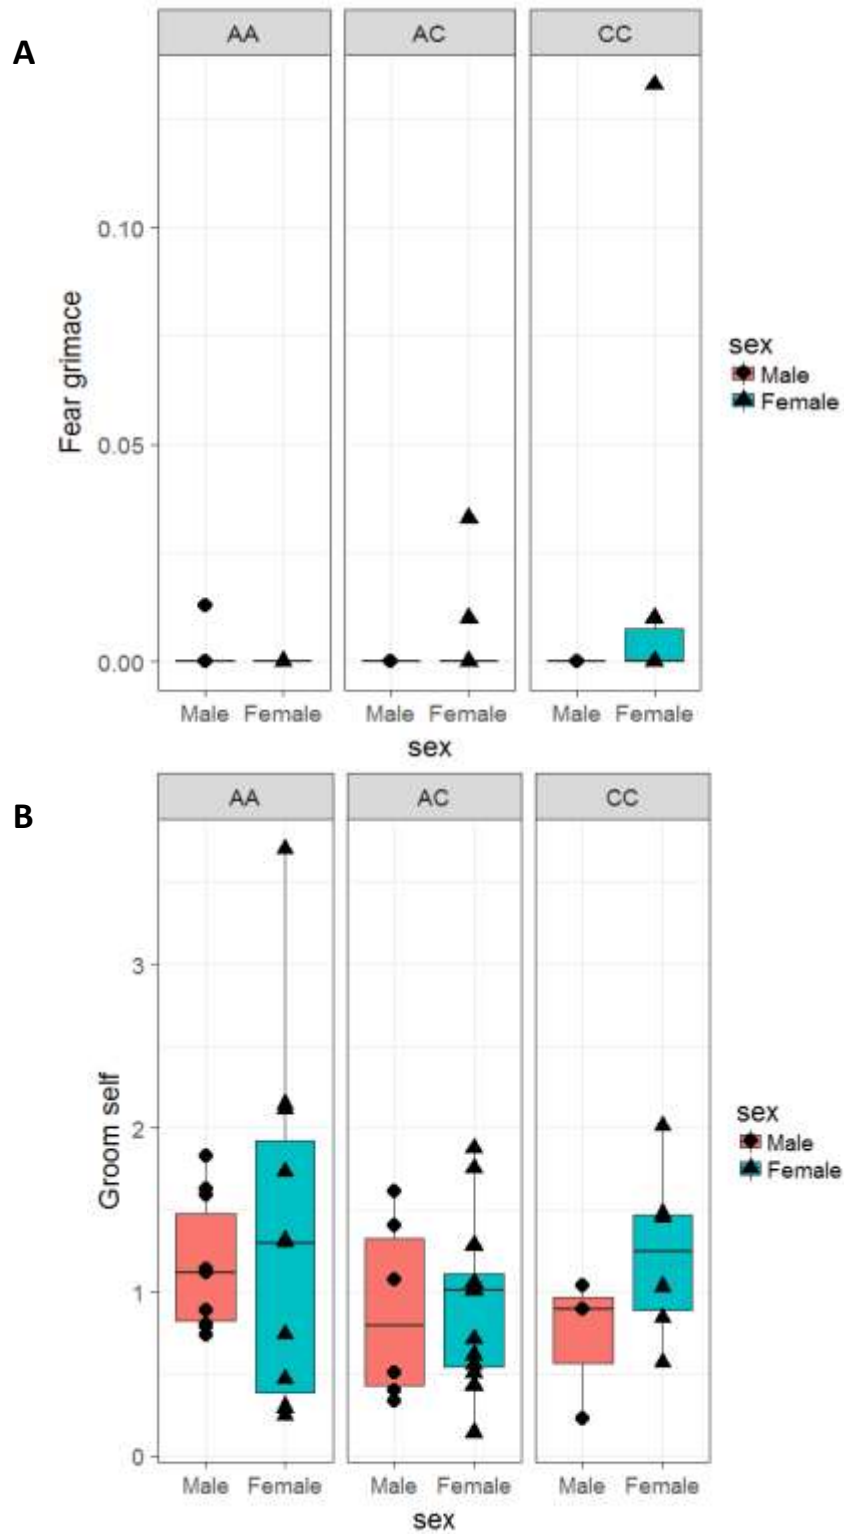

**Figure S2:** Genotype by sex interaction effects on individual behaviors potentially reflecting agonistic behavior: (A) contact aggression (B) non-contact aggression (C) aggressiveness

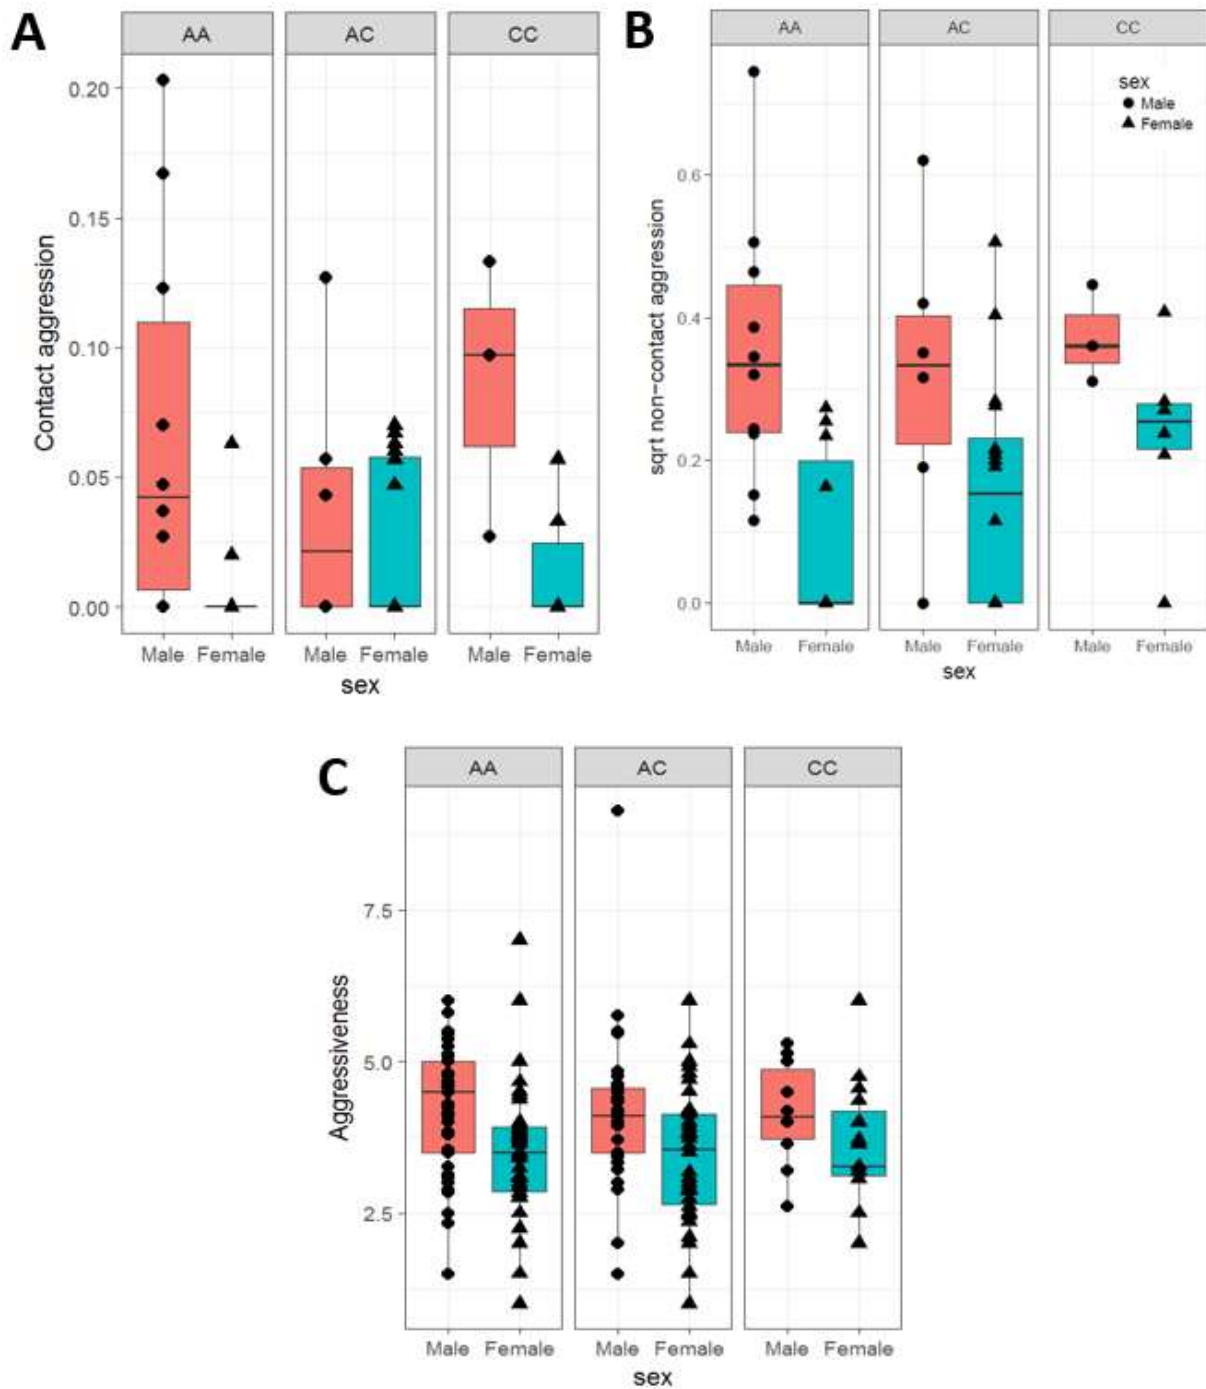

Supplement: supplement_material_msz061.pdf [file supplement_material_msz061.pdf]
